# Supplementary material for: TBX3 regulates the transcription of VEGFA to promote osteoblasts proliferation and microvascular regeneration
Source: PeerJ journal article supplement (doi:10.7717/peerj.13722), 2022-07-11
Supplement: raw_data_for_qRT-PCR_&_OD_.zip [file raw_data_for_qRT-PCR_%26_OD_.zip]

## Sheet: Sheet1
GAPDH used as a reference gene
	TBX3
Group		Internal reference CT value			CT value of A index			Mean CT value of internal reference	Mean CT values of A index	△Ct of the A index (target gene-internal reference)	Mean value of ΔCt for the control group	△△Ct of A index (experimental group - control group)	2-△△Ct
NC	1	12.4074	12.3535	12.2596	29.4851	29.9114	29.1853	12.3402	29.5273	17.1871	16.6236	0.563567	0.676627
	2	12.7079	12.1864	12.263	28.7997	28.2372	28.3369	12.3857	28.4579	16.0722		-0.551363	1.46547
	3	12.1525	12.2768	12.3619	28.8064	28.8984	28.9205	12.2637	28.8751	16.6113		-0.0122036	1.00849
TBX siRNA	1	11.6672	11.7546	12.009	31.1897	31.9426	31.9	11.8103	31.6774	19.8672		3.24362	0.105578
	2	11.3091	11.2466	11.3978	30.9177	31.1285	30.7658	11.3178	30.9373	19.6195		2.99593	0.125353
	3	11.8021	11.155	11.0916	30.7087	30.4652	30.4112	11.3496	30.5284	19.1788		2.55528	0.170132
	VEGFA
Group		Internal reference CT value			CT value of A index			Mean CT value of internal reference	Mean CT values of A index	△Ct of the A index (target gene-internal reference)	Mean value of ΔCt for the control group	△△Ct of A index (experimental group - control group)	2-△△Ct
NC	1	12.4074	12.3535	12.2596	29.8624	29.9691	29.2156	12.3402	29.6824	17.3422	17.4321	-0.0898966	1.06429
	2	12.7079	12.1864	12.263	29.9313	30.0852	30.2811	12.3857	30.0992	17.7135		0.281348	0.822822
	3	12.1525	12.2768	12.3619	29.7312	29.8779	28.9041	12.2637	29.5044	17.2407		-0.191451	1.14191
TBX siRNA	1	11.6672	11.7546	12.009	30.8624	30.9691	31.2156	11.8103	31.0157	19.2054		1.77334	0.29253
	2	11.3091	11.2466	11.3978	30.9313	30.0852	30.2811	11.3178	30.4325	19.1147		1.6826	0.31152
	3	11.8021	11.155	11.0916	32.7312	32.8779	32.9041	11.3496	32.8377	21.4882		4.05606	0.0601178
	VEGFB指标
Group		Internal reference CT value			CT value of A index			Mean CT value of internal reference	Mean CT values of A index	△Ct of the A index (target gene-internal reference)	Mean value of ΔCt for the control group	△△Ct of A index (experimental group - control group)	2-△△Ct
NC	1	12.4074	12.3535	12.2596	29.4316	29.2814	28.7323	12.3402	29.1484	16.8082	16.8107	-0.00244787	1.0017
	2	12.7079	12.1864	12.263	29.223	29.2002	29.435	12.3857	29.2861	16.9003		0.0896256	0.939767
	3	12.1525	12.2768	12.3619	29.0876	28.8822	28.9919	12.2637	28.9872	16.7235		-0.0871777	1.06229
TBX siRNA	1	11.6672	11.7546	12.009	30.6078	30.3374	30.8254	11.8103	30.5902	18.78		1.96927	0.255382
	2	11.3091	11.2466	11.3978	29.3891	29.0907	29.7554	11.3178	29.4117	18.0939		1.28323	0.410875
	3	11.8021	11.155	11.0916	29.7011	29.2106	28.9601	11.3496	29.2906	17.941		1.13034	0.456809
	VEGFC指标
Group		Internal reference CT value			CT value of A index			Mean CT value of internal reference	Mean CT values of A index	△Ct of the A index (target gene-internal reference)	Mean value of ΔCt for the control group	△△Ct of A index (experimental group - control group)	2-△△Ct
NC	1	12.4074	12.3535	12.2596	30.1897	29.9426	29.9	12.3402	30.0108	17.6706	17.4956	0.174993	0.885772
	2	12.7079	12.1864	12.263	29.9177	30.1285	29.7658	12.3857	29.9373	17.5516		0.0559612	0.961953
	3	12.1525	12.2768	12.3619	29.7087	29.4652	29.4112	12.2637	29.5284	17.2646		-0.230955	1.17361
TBX siRNA	1	11.6672	11.7546	12.009	30.7581	30.3177	30.9955	11.8103	30.6904	18.8802		1.38456	0.383005
	2	11.3091	11.2466	11.3978	30.9761	30.7502	30.7958	11.3178	30.8407	19.5229		2.02727	0.245319
	3	11.8021	11.155	11.0916	30.5586	30.6982	30.582	11.3496	30.6129	19.2634		1.76777	0.293663
