# Supplementary material for: TBX3 regulates the transcription of VEGFA to promote osteoblasts proliferation and microvascular regeneration
Source: PeerJ. 2022 Jul 11;10:e13722. doi: 10.7717/peerj.13722 (PMC9281600; doi:10.7717/peerj.13722)
Supplement: Supplemental Information 7 [file peerj-10-13722-s007.xlsx]

## Sheet: Sheet1
regulon	cluster
FOXJ2_extended (39g)	M1
RXRA (17g)	M1
STAT3 (24g)	M1
ARID3A (22g)	M1
HOXA5 (38g)	M1
SMAD1_extended (22g)	M1
PHF8_extended (29g)	M1
VEZF1_extended (47g)	M1
ZNF362 (22g)	M1
MAFG_extended (22g)	M1
FOXP2_extended (55g)	M1
ATF6 (18g)	M1
CUX1 (12g)	M1
HOXA6_extended (17g)	M1
HOXA10 (34g)	M1
HOXA11_extended (11g)	M1
TCF12_extended (13g)	M1
XRCC1 (17g)	M1
FLI1 (19g)	M1
SIX4 (10g)	M1
PITX1 (20g)	M1
BRCA1 (292g)	M3
RB1 (76g)	M3
GABPB1_extended (25g)	M3
HSF1_extended (19g)	M3
GMEB2_extended (28g)	M3
MEF2D (11g)	M3
SREBF2 (12g)	M3
FOXJ3_extended (15g)	M3
SETDB1_extended (17g)	M3
SOX15 (12g)	M3
STAT5A_extended (13g)	M3
TP53 (16g)	M3
ARNTL2 (28g)	M3
FOXK1_extended (18g)	M3
SMC3_extended (14g)	M3
NFYA_extended (59g)	M2
ETV6 (93g)	M2
BRF1_extended (115g)	M2
BRF2_extended (125g)	M2
ETV3 (89g)	M2
TFEB (81g)	M2
ARNT2 (46g)	M2
EP300_extended (30g)	M2
SIX5 (80g)	M2
HOXA3_extended (20g)	M2
ZNF274 (23g)	M2
VDR (15g)	M2
DNMT3A (12g)	M2
NR2C1_extended (20g)	M2
ZNF226 (13g)	M2
NFATC3_extended (31g)	M2
IRF7_extended (13g)	M2
IRF2 (34g)	M2
ZBTB7B_extended (19g)	M2
IRF9_extended (29g)	M2
RREB1_extended (34g)	M2
ZBTB7A_extended (31g)	M2
MLX_extended (26g)	M2
ZBTB6 (17g)	M2
RARA_extended (16g)	M2
THAP11 (15g)	M2
TBX18_extended (13g)	M2
STAT6 (16g)	M2
NFATC4 (16g)	M2
KLF12_extended (15g)	M2
UBTF_extended (38g)	M2
NR2F6 (14g)	M2
RFX5_extended (22g)	M2
CREM (11g)	M2
ATF6B_extended (14g)	M2
KLF8_extended (14g)	M2
HOXA7_extended (15g)	M2
ZNF76_extended (10g)	M2
EN1 (22g)	M2
CREBL2 (19g)	M2
IRF3_extended (15g)	M2
RFX1_extended (93g)	M2
TBP (14g)	M2
CHD1 (27g)	M2
ETS2_extended (35g)	M2
MECP2 (11g)	M2
PRDM4 (11g)	M2
ZNF740 (21g)	M2
THRA (16g)	M2
ZBTB40 (14g)	M2
SUZ12_extended (24g)	M2
TRIM28_extended (18g)	M2
SMARCC1_extended (13g)	M2
SMARCC2 (15g)	M2
POLR3A_extended (12g)	M2
MAF_extended (12g)	M2
HMGN3_extended (15g)	M2
SP3 (11g)	M2
NR1H2_extended (12g)	M2
KLF16_extended (74g)	M4
IRF1_extended (241g)	M4
REL (12g)	M4
TCF3 (11g)	M4
POU2F1 (12g)	M4
BCL3_extended (49g)	M4
NFKB1 (25g)	M4
MNT_extended (17g)	M4
MAFF_extended (16g)	M4
HIC1_extended (28g)	M4
NR2F2 (22g)	M4
SREBF1 (29g)	M7
FOXN2_extended (33g)	M7
TEF (27g)	M7
DBP (11g)	M7
NR1D1 (11g)	M7
JDP2 (12g)	M7
PPARA (10g)	M7
TCF7L2_extended (46g)	M7
MXD1_extended (19g)	M6
MYC (65g)	M6
CEBPG (105g)	M6
CEBPB (54g)	M6
DDIT3 (33g)	M6
E2F4 (286g)	M8
EZH2_extended (124g)	M8
TCF7 (38g)	M5
NPAS2_extended (15g)	M5
BHLHE41_extended (23g)	M5
FOSB (49g)	M5
EGR3 (72g)	M5
FOS (14g)	M5
RELB (44g)	M5
NFKB2 (11g)	M5
EGR2 (47g)	M5
BHLHE40 (29g)	M5
SOX9 (11g)	M5
PRKAA1 (18g)	M5
MAFB_extended (11g)	M5
RELA (11g)	M5
HIVEP1 (11g)	M5
TBX3_extended (37g)	M5
POU2F2_extended (13g)	M5
PRRX2 (15g)	M5
ELK3 (1183g)	M5
ETV5 (891g)	M5
TFDP1 (805g)	M5
FOSL1 (374g)	M5
KLF6_extended (427g)	M5
TAF7_extended (918g)	M5
