# Supplementary material for: TBX3 regulates the transcription of VEGFA to promote osteoblasts proliferation and microvascular regeneration
Source: PeerJ journal article supplement (doi:10.7717/peerj.13722), 2022-07-11

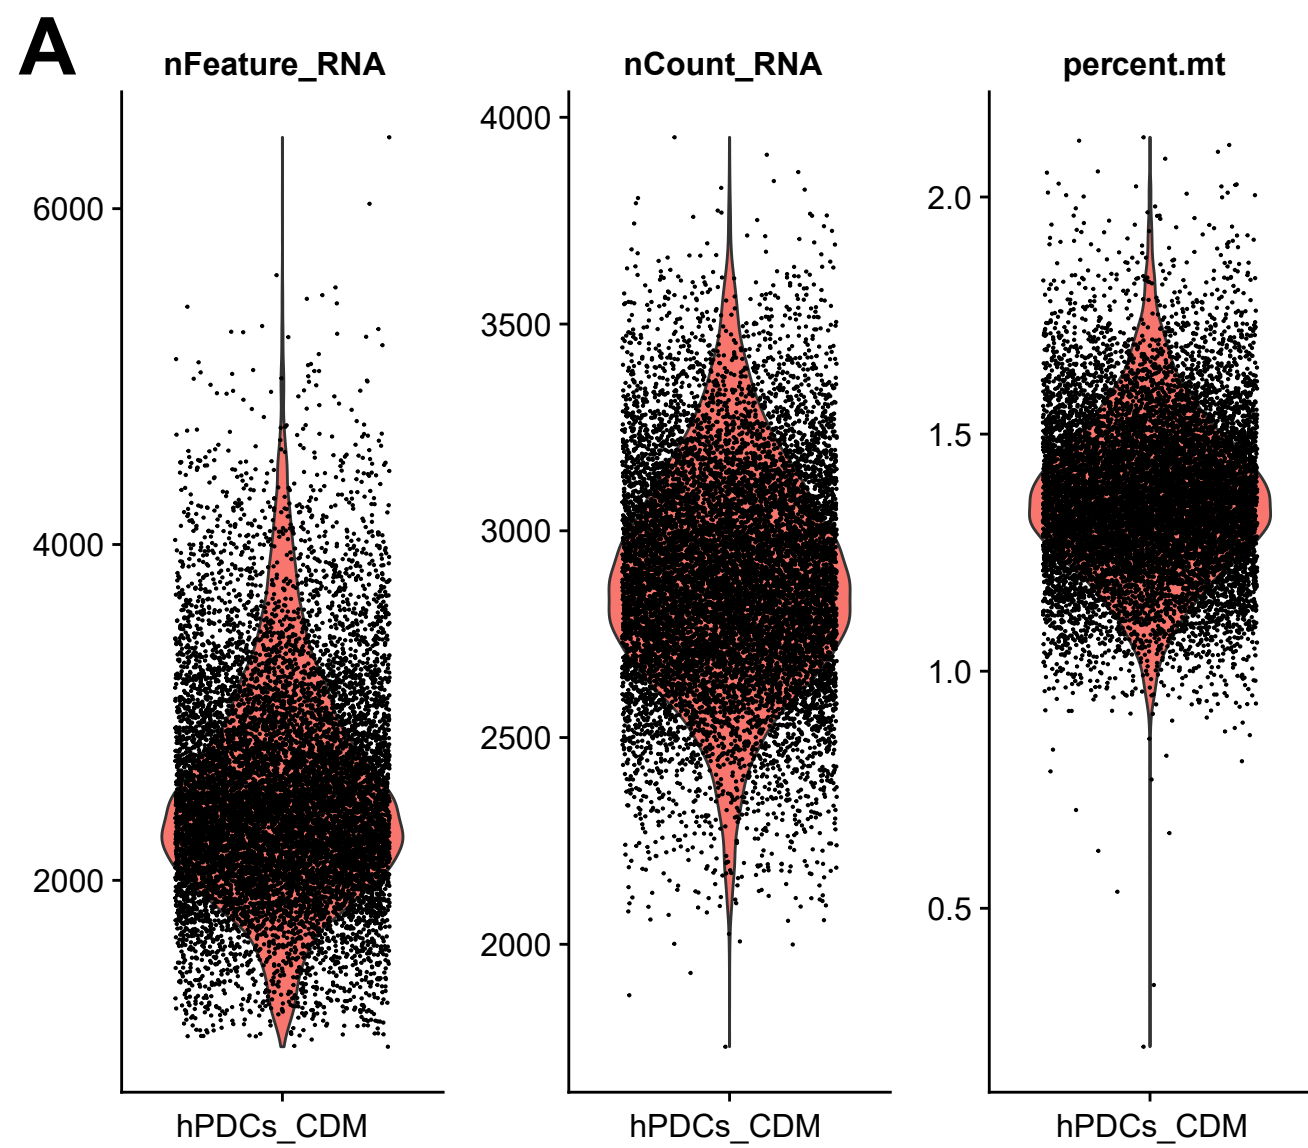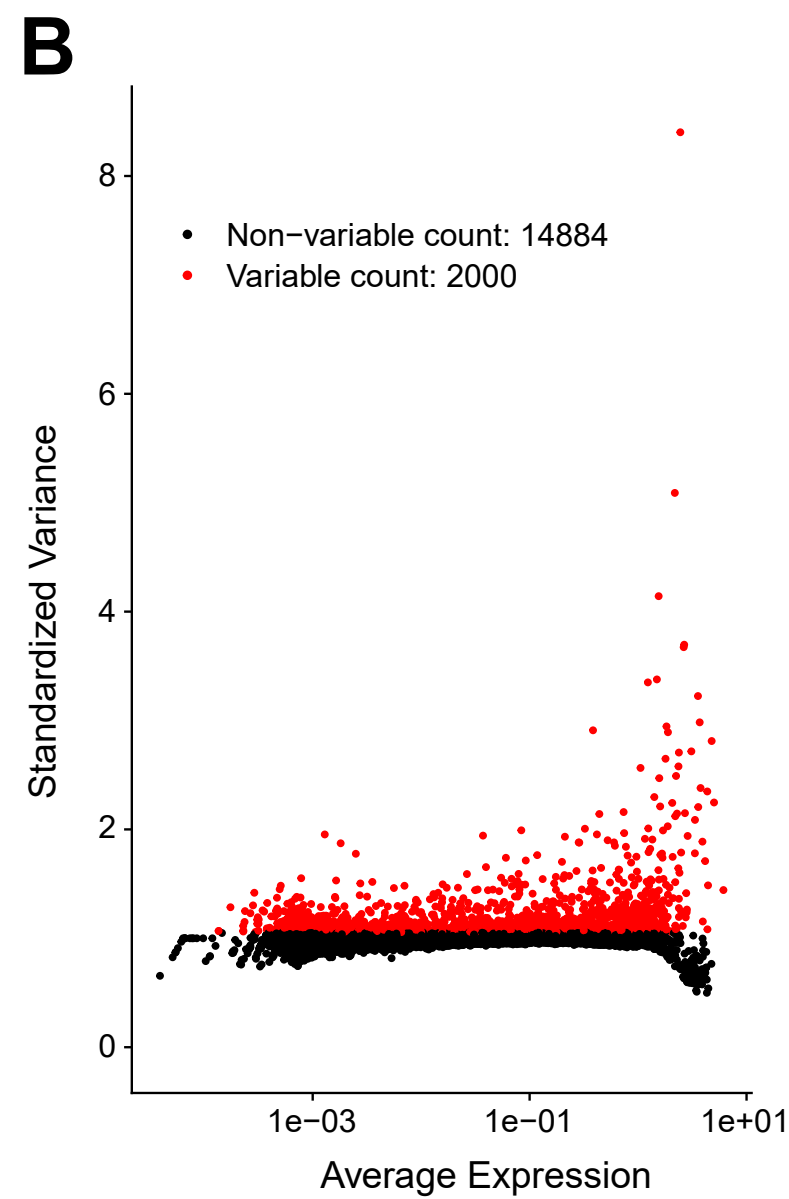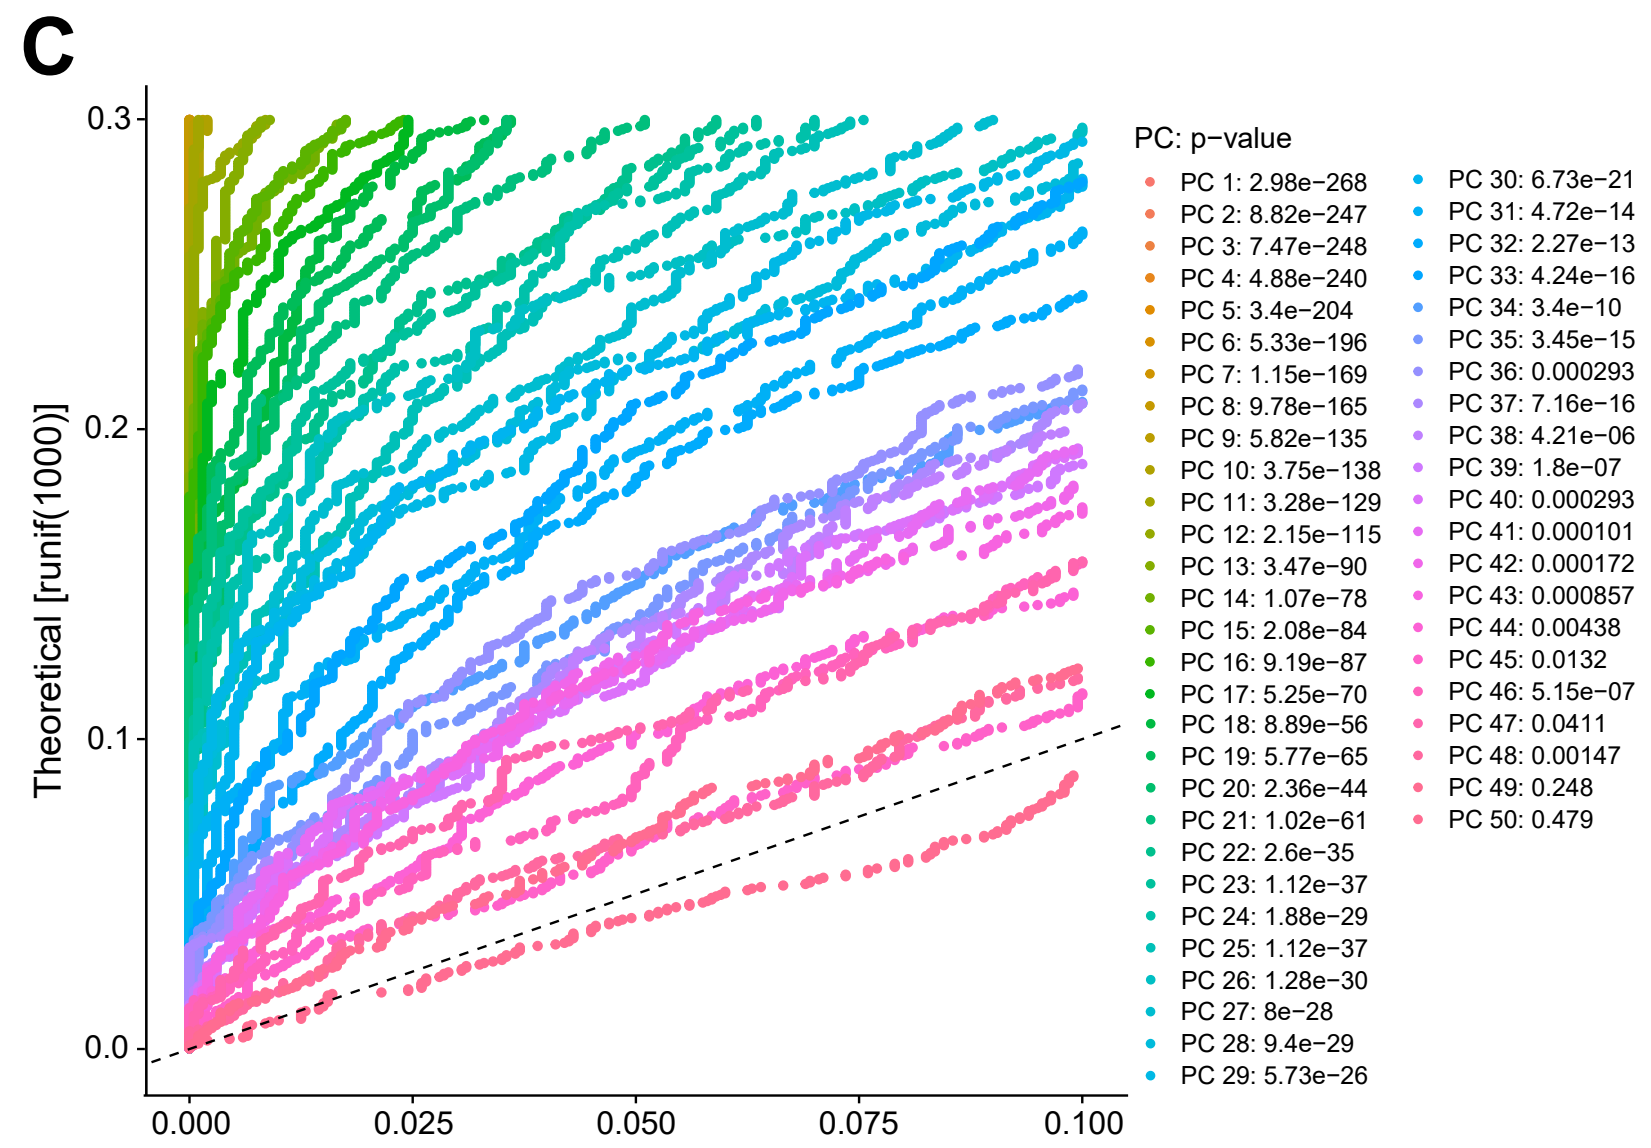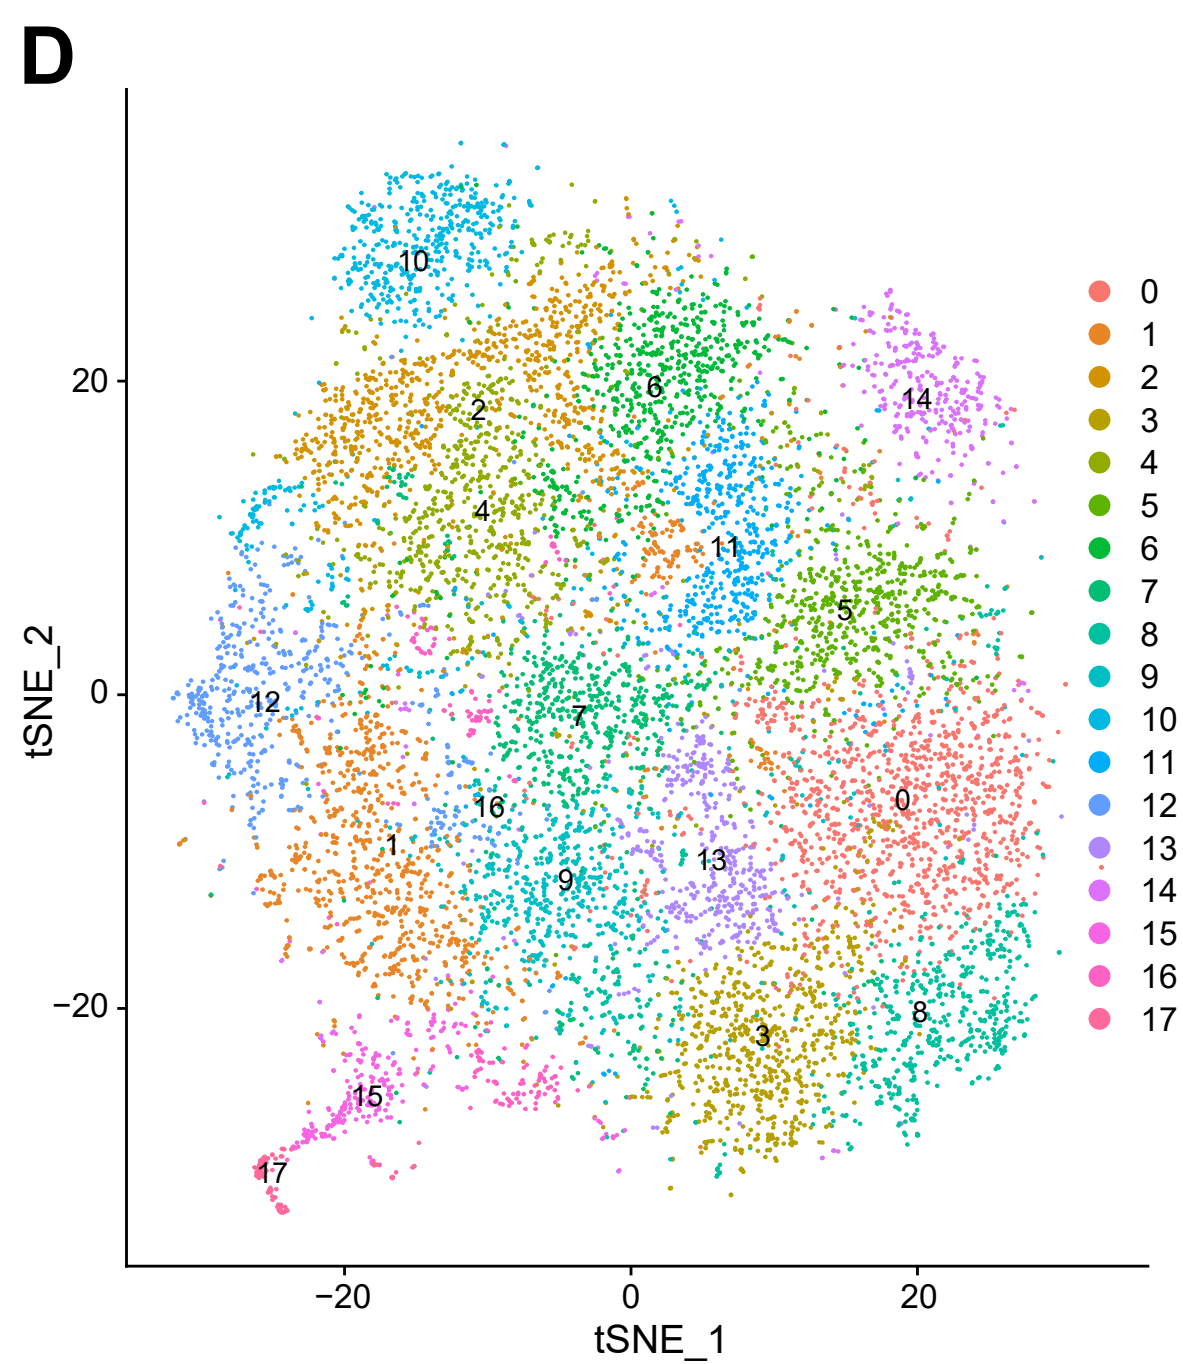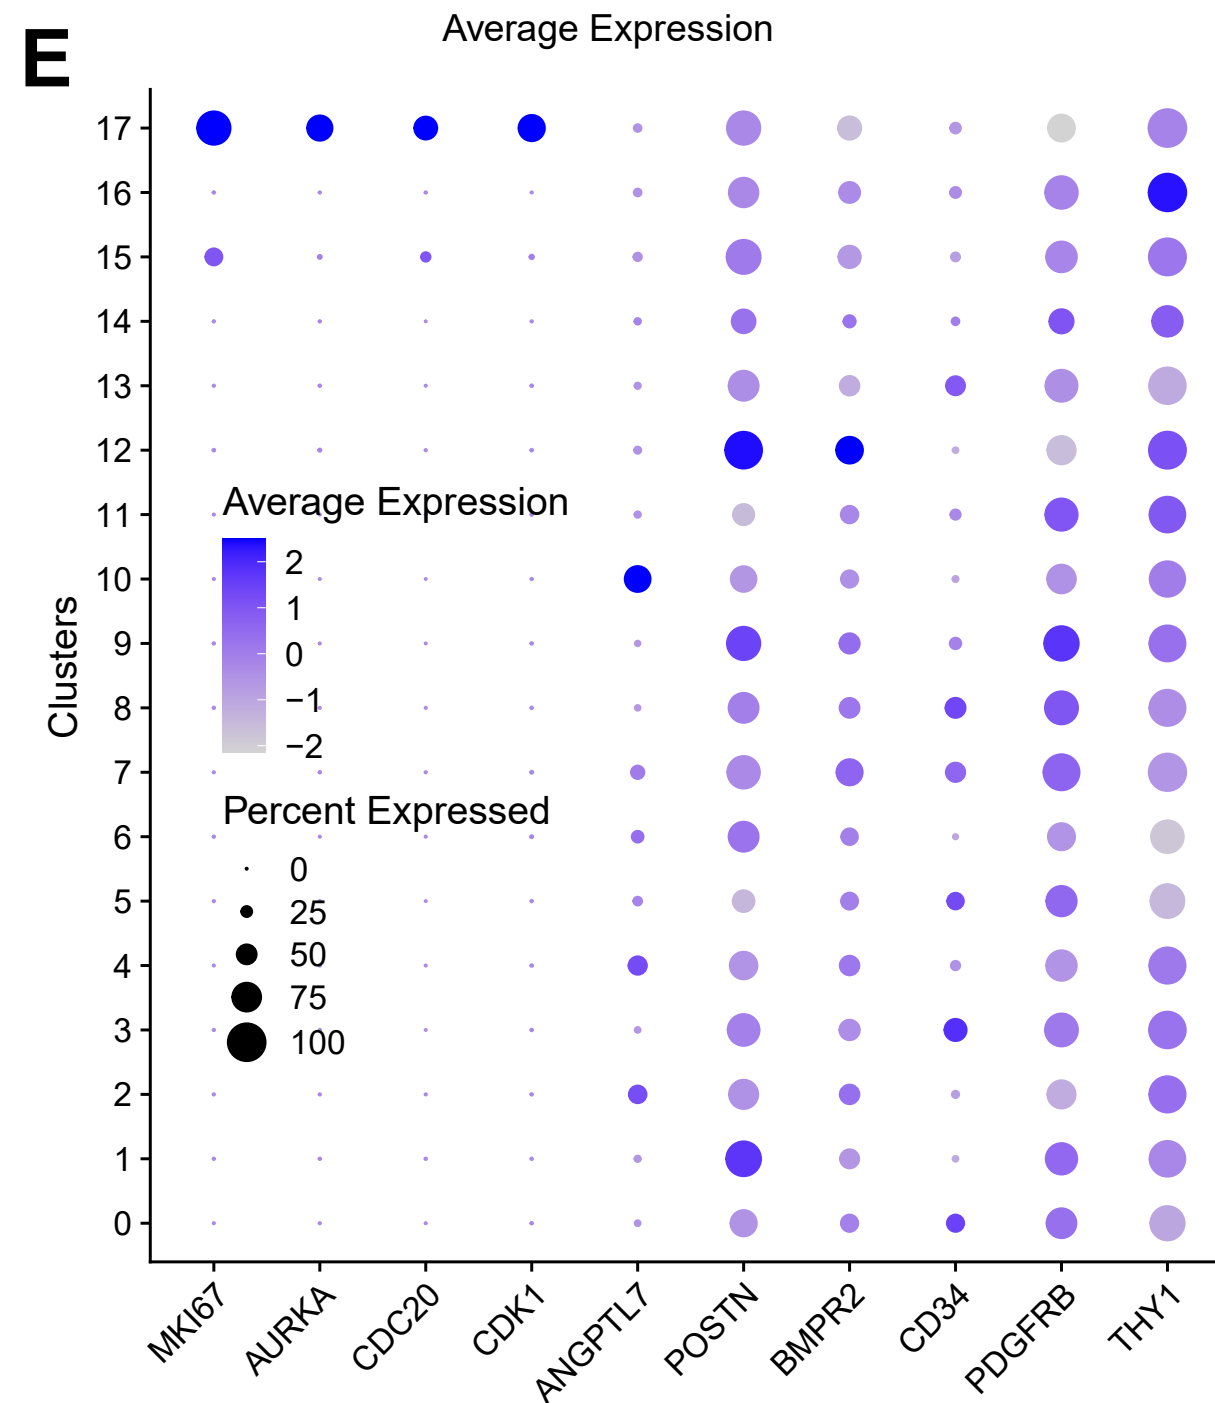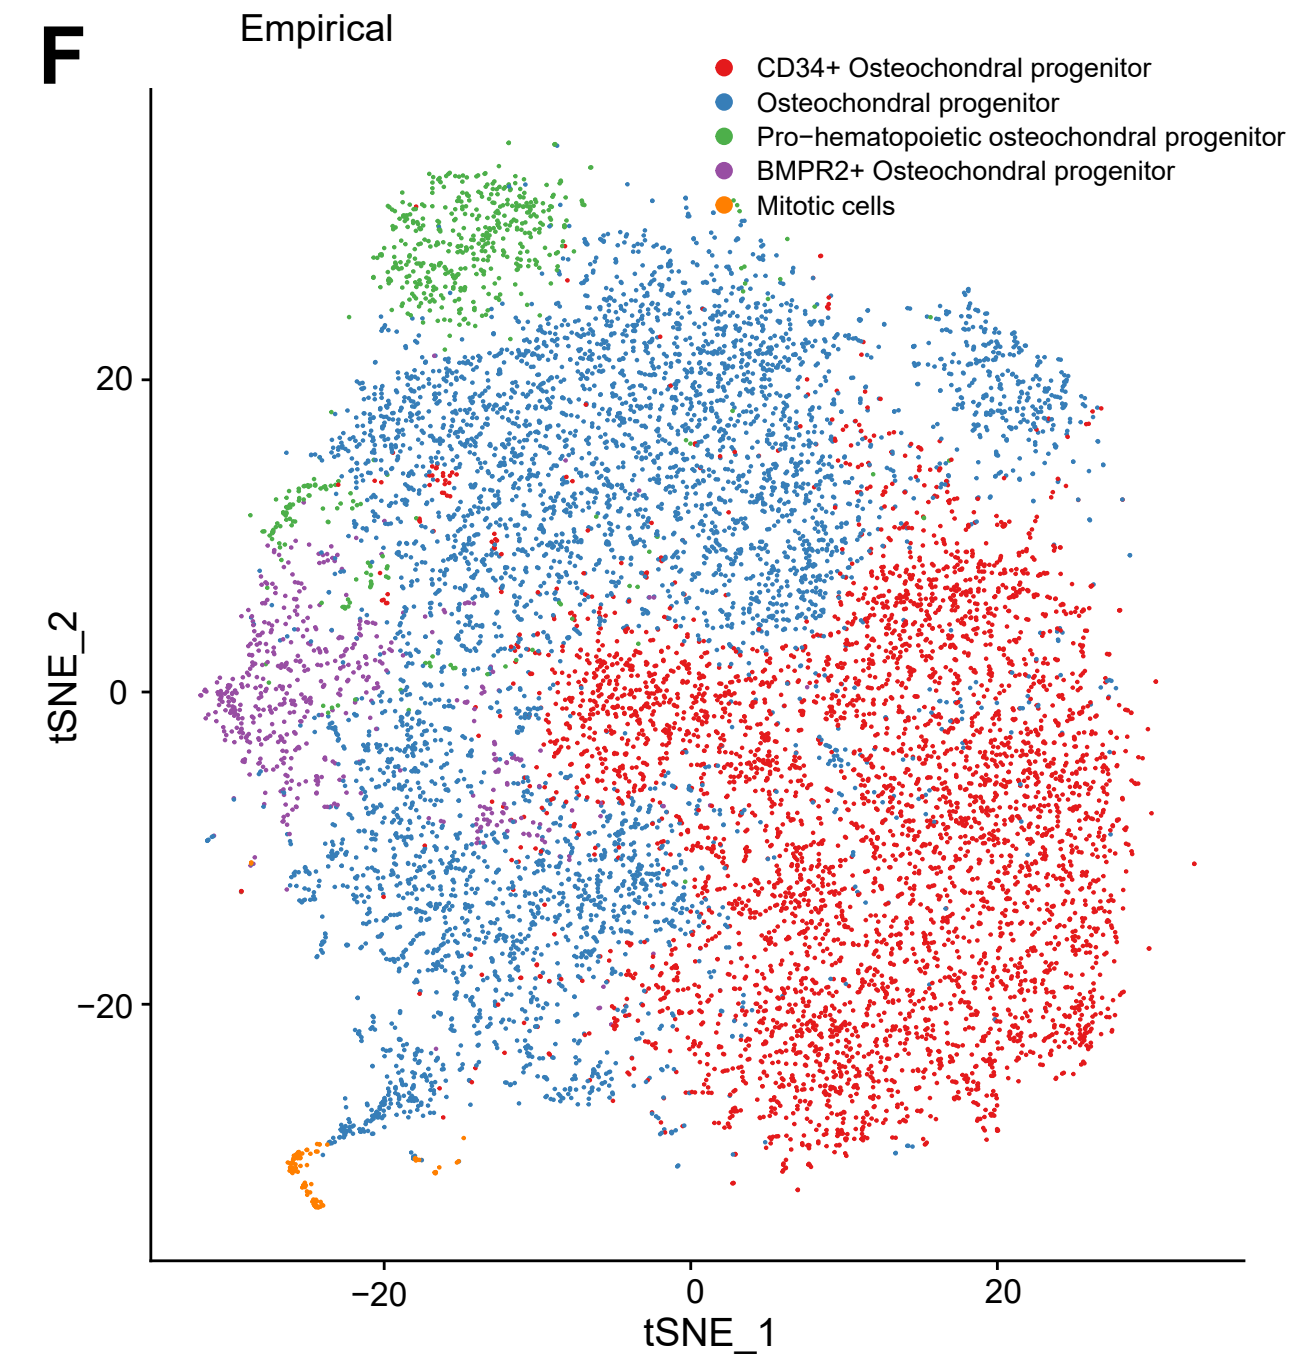

Supplement: Supplementary_figure_1.pdf [file Supplementary_figure_1.pdf]
