# Supplementary material for: TBX3 regulates the transcription of VEGFA to promote osteoblasts proliferation and microvascular regeneration
Source: PeerJ journal article supplement (doi:10.7717/peerj.13722), 2022-07-11

**A**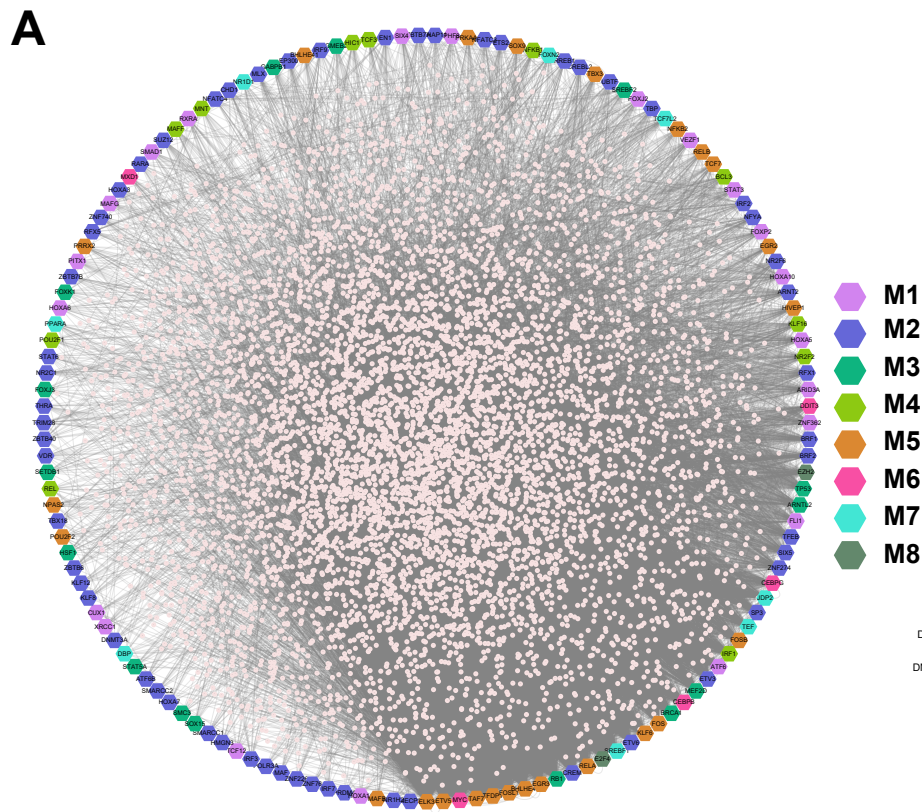**B**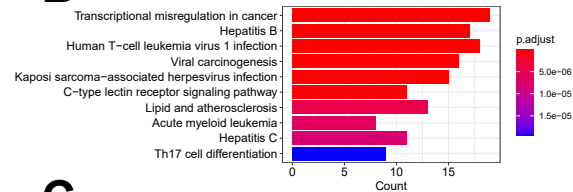**C**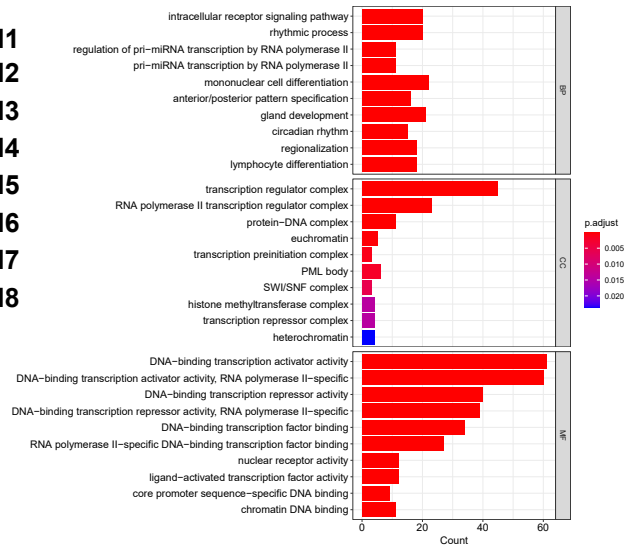

Supplement: Supplementary_figure_4.pdf [file Supplementary_figure_4.pdf]
